# Supplementary material for: Clinical Features of Tubulointerstitial Nephritis and Uveitis (TINU) Syndrome in Hokkaido, Japan
Source: Research Square preprint supplement (doi:10.21203/rs.3.rs-8535691/v1), 2026-01-30
Supplement: Supplementary file 1 [file b253d6d702137d5133969699.docx]

**Supplementary Table. Treatment, visual outcomes and follow-up of patients**

| Case | Age | Sex | Oral PSL | | Immunomodu-latory agent | Recurrences | | Remission  (age) | Follow-up  (months) | VA at first  follow up | | VA at last  follow up | | Complications |
| --- | --- | --- | --- | --- | --- | --- | --- | --- | --- | --- | --- | --- | --- | --- |
|  | period  (months) |  |  | number |
| 1 | 14 | F | **–** |  |  | **–** |  | 14 | 188 | R  L | 0.9  1.2 | R  L | 1.0  1.0 |  |
| 2 | 11 | F | **–** |  |  | **–** |  | 11 | 184 | R  L | 1.2  1.0 | R  L | N  N |  |
| 3 | 17 | F | **+** | 84 |  | **+** | 1 | 24 | 178 | R  L | 1.5  1.5 | R  L | 1.5  1.5 |  |
| 4 | 32 | M | **–** |  |  | **+** | 1 |  | 182 | R  L | 1.2  0.3 | R  L | N  N | CME |
| 5 | 13 | F | **–** |  |  | **+** | 2 | 15 | 180 | R  L | 1.2  2.0 | R  L | 1.5  1.2 |  |
| 6 | 8 | F | **+** | 122 |  | **+** | 2 | 18 | 172 | R  L | 1.2  1.2 | R  L | 1.2  1.2 |  |
| 7 | 12 | F | **+** | 15 |  | **+** | 1 | 13 | 167 | R  L | 1.0  1.0 | R  L | 1.2  1.2 | OH |
| 8 | 12 | F | **+** | 21 |  | **+** | 1 | 14 | 156 | R  L | 1.2  1.2 | R  L | 1.2  0.1 | OH, CNV, macular degeneration |
| 9 | 16 | F | **–** |  |  | **+** | 1 | 16 | 140 | R  L | 1.5  1.5 | R  L | 1.5  1.2 |  |
| 10 | 17 | M | **+** | 24 |  | **+** | 2 | 21 | 114 | R  L | 0.2  UN | R  L | 1.5  1.5 |  |
| 11 | 14 | F | **+** | 30 |  | **+** | 2 | 16 | 100 | R  L | 0.3  1.0 | R  L | 1.0  0.7 | OH  OH |
| 12 | 14 | F | **+** | 40 | mizoribine | **–** |  | 17 | 93 | R  L | 1.2  1.2 | R  L | 1.0  1.0 |  |
| 13 | 15 | F | **–** |  |  | **–** |  | 15 | 89 | R  L | 0.6  1.5 | R  L | 1.5  1.5 |  |
| 14 | 14 | F | **–** |  |  | **+** | 1 | 15 | 84 | R  L | 1.2  1.2 | R  L | 1.2  1.2 |  |
| 15 | 13 | M | **+** | 3 |  | **+** | 1 | 13 | 81 | R  L | 1.2  1.5 | R  L | 1.0  1.2 |  |
| 16 | 18 | M | **+** | 29 |  | **+** | 1 | 21 | 64 | R  L | 0.9  1.0 | R  L | 1.2  1.2 |  |
| 17 | 14 | F | **–** |  |  | **–** |  | 14 | 66 | R  L | 1.2  1.5 | R  L | 1.2  1.5 |  |
| 18 | 16 | F | **–** |  |  | **–** |  | 16 | 60 | R  L | 1.5  1.5 | R  L | 1.2  1.5 |  |
| 19 | 12 | F | **+** | 54 | MTX | **+** | 2 | 16 | 54 | R  L | 1.0  1.2 | R  L | 1.2  1.2 |  |
| 20 | 54 | F | **+** | 24 |  | **–** |  |  | 52 | R  L | 0.4  1.0 | R  L | 0.6  0.9 | OH, CME  OH, cataract |
| 21 | 14 | F | **–** |  |  | **–** |  | 14 | 57 | R  L | 0.2  1.0 | R  L | 0.8  1.0 |  |
| 22 | 10 | M | **+** | 39 |  | **+** | 2 | 13 | 46 | R  L | 0.2  1.0 | R  L | 1.5  1.0 | CME  CME |
| 23 | 9 | M | **+** | 1 |  | **+** | 3 | 13 | 45 | R  L | 1.5  1.5 | R  L | 0.2  1.0 | OH, cataract, MH |
| 24 | 17 | M | **+** | 14 |  | **+** | 2 | 20 | 44 | R  L | 1.2  1.5 | R  L | 1.5  1.2 | NVD, VH |
| 25 | 19 | M | **–** |  |  | **–** |  | 19 | 48 | R  L | 1.2  1.0 | R  L | 1.5  1.2 |  |
| 26 | 15 | F | **–** |  |  | **–** |  | 15 | 47 | R  L | 0.8  0.9 | R  L | 1.2  1.2 |  |
| 27 | 16 | F | **–** |  |  | **+** | 1 | 16 | 46 | R  L | 1.2  1.2 | R  L | 1.5  1.5 |  |
| 28 | 14 | F | **–** |  |  | **+** | 1 | 15 | 37 | R  L | 1.0  1.2 | R  L | 1.2  1.2 |  |
| 29 | 18 | M | **+** | 13 |  | **–** |  | 19 | 35 | R  L | 0.9  1.0 | R  L | 1.2  1.5 |  |
| 30 | 12 | M | **+** | 18 |  | **+** | 3 | 13 | 12 | R  L | 1.5  1.0 | R  L | 1.0  1.0 |  |
| 31 | 16 | F | **+** | 21* |  | **+** | 1 | 18 | 119 | R  L | 1.5  1.5 | R  L | 1.5  1.2 |  |

PSL: prednisolone, MTX: methotrexate

VA: visual acuity, N: not performed, CME: cystoid macular edema, CNV: choroidal neovascularization,

OH: Ocular hypertension, MH: macular hole, NVD: optic neovascularization, VH: vitreous hemorrhage

* Prescribed by internal medicine doctor after remission of uveitis
